# Supplementary material for: g-C3N5-dots as fluorescence probes prepared by an alkali-assisted hydrothermal method for cell imaging
Source: Royal Society of Chemistry journal article supplement (doi:10.1039/d2ra03934f), 2022-01-01
Supplement: d2ra03934f1.pdf [file d2ra03934f1.pdf]

## ***Supporting Information***

g-C<sub>3</sub>N<sub>5</sub>-dots as fluorescence probes prepared by alkali-assisted  
hydrothermal method for cell imaging

Xiangwang Zeng<sup>a</sup>, Mengke Hou<sup>a</sup>, Pan Zhu<sup>a</sup>, Minyi Yuan<sup>a</sup>, Sitao Ouyang<sup>a</sup>, Qiujuan Lu<sup>a</sup>, Chenxi  
Zhao<sup>a</sup>, Haiyan Wang<sup>a\*</sup>, Fuyou Du<sup>a\*</sup>, Guangsheng Zeng<sup>a\*</sup> and Youyu Zhang<sup>b\*</sup>

<sup>a</sup> *College of Biological and Environmental Engineering, Changsha University,  
Changsha, 410022, China*

<sup>b</sup> *Key Laboratory of Chemical Biology and Traditional Chinese Medicine Research  
(Ministry of Education), College of Chemistry and Chemical Engineering, Hunan  
Normal University, Changsha, 410081, China*

---

\* Corresponding author: Tel: +86-84261506; Fax: +86-731-84261382;

E-mail address: wanghaiyan@ccsu.edu.cn, dufu2005@126.com,  
guangsheng\_zeng@126.com, zhangyy@hunnu.edu.cn

**Table S1.** Comparison of different methods for the preparation of CN quantum dots.

| Precursors                             | methods                                          | synthesized time | references   |
|----------------------------------------|--------------------------------------------------|------------------|--------------|
| bulk g-C <sub>3</sub> N <sub>4</sub>   | acid treatment and hydrothermal method           | 26 h             | 1            |
| g-C <sub>3</sub> N <sub>4</sub> sheets | ultrasonication treatment                        | 48 h             | 2            |
| bulk g-C <sub>3</sub> N <sub>4</sub>   | electrochemical “tailoring” method               | 3 h              | 3            |
| bulk g-C <sub>3</sub> N <sub>4</sub>   | acid treatment and ultrasonication treatment     | 14 h             | 4            |
| GH and EDAT                            | hydrothermal method                              | 24 h             | 5            |
| bulk g-C <sub>3</sub> N <sub>4</sub>   | acid treatment and sonication treatment          | 22 h             | 6            |
| bulk g-C <sub>3</sub> N <sub>4</sub>   | ultrasonic treatment and hydrothermal method     | 6 h              | 7            |
| bulk g-C <sub>3</sub> N <sub>4</sub>   | NH <sub>3</sub> treatment and liquid exfoliation | 20 h             | 8            |
| DAMN and 4-amino-TEMPO                 | hydrothermal method                              | 6 h              | 9            |
| bulk g-C <sub>3</sub> N <sub>5</sub>   | alkali assisted-hydrothermal method              | 60 min           | present work |

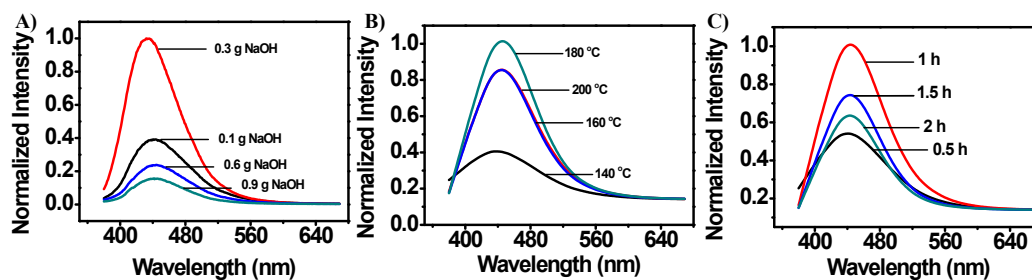

**Figure S1.** (A) The FL spectra of g-C<sub>3</sub>N<sub>5</sub>-dots synthesized by hydrothermal method using the different mass ratio of g-C<sub>3</sub>N<sub>5</sub> powder and NaOH (0.03:0.1, 0.03:0.3, 0.03:0.6 and 0.03:0.9). (B) The FL spectra of g-C<sub>3</sub>N<sub>5</sub>-dots synthesized by hydrothermal method under different hydrothermal temperature (140 °C, 160 °C, 180 °C and 200 °C). (C) The FL spectra of g-C<sub>3</sub>N<sub>5</sub>-dots synthesized by hydrothermal method under different hydrothermal time (0.5 h, 1 h, 1.5 h and 2 h). The concentration of the prepared product is 0.05 mg mL<sup>-1</sup>. The excitation wavelength is 360 nm. The slit widths of emission and excitation are 5 nm.

**Table S2.** Comparison of g-C<sub>3</sub>N<sub>5</sub>-dots prepared at different reaction conditions.

| Factor | <i>T</i> (°C) | <i>t</i> (h) | r <sub>g-C<sub>3</sub>N<sub>5</sub>/NaOH</sub> | FLQY (%) |
|--------|---------------|--------------|------------------------------------------------|----------|
| 1      | 180           | 1            | 0.03:0.1                                       | 5.1      |
| 2      | 180           | 1            | 0.03:0.3                                       | 12.0     |
| 3      | 180           | 1            | 0.03:0.6                                       | 3.6      |
| 4      | 180           | 1            | 0.03:0.9                                       | 2.4      |
| 5      | 140           | 1            | 0.03:0.3                                       | 4.7      |
| 6      | 160           | 1            | 0.03:0.3                                       | 10.2     |
| 7      | 200           | 1            | 0.03:0.3                                       | 10.9     |
| 8      | 180           | 0.5          | 0.03:0.3                                       | 6.8      |
| 9      | 180           | 1.5          | 0.03:0.3                                       | 9.4      |
| 10     | 180           | 2            | 0.03:0.3                                       | 7.7      |

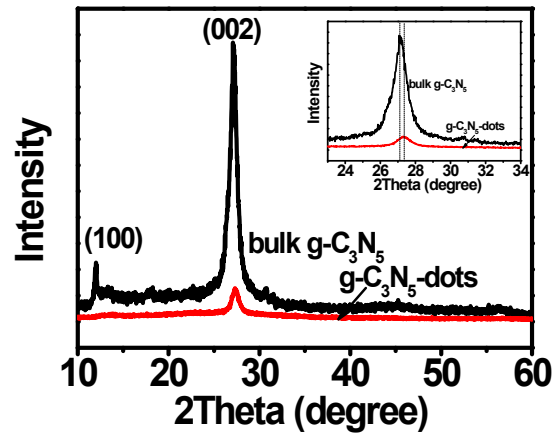

Figure S2. XRD patterns of bulk  $g\text{-C}_3\text{N}_5$  and  $g\text{-C}_3\text{N}_5\text{-dots}$ .

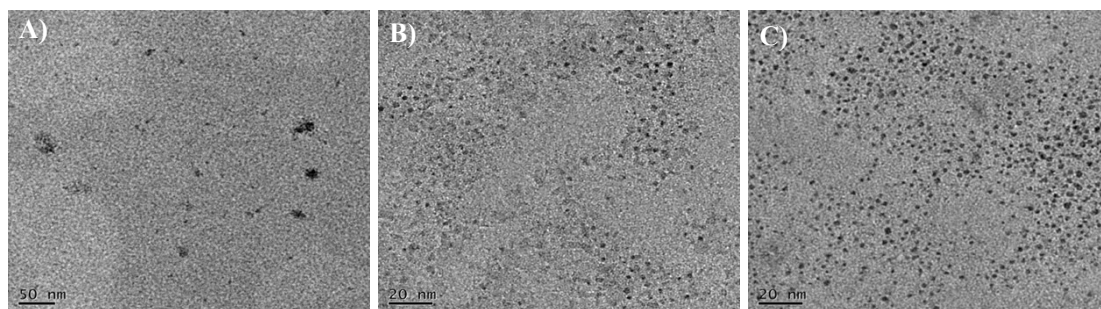

**Figure S3.** The TEM of as-synthesized g-C<sub>3</sub>N<sub>5</sub>-dots in the (A) EA, (B) CHCl<sub>3</sub> and (C) DMSO.

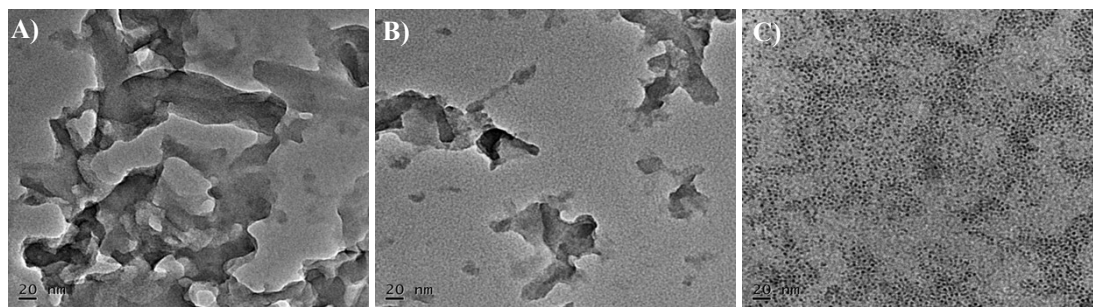

**Figure S4.** (A) TEM images of synthesized products prepared by hydrothermal method under (A)  $\text{H}_2\text{O}$ , (B) 1.5 M HCl and (C) 1.5 M NaOH conditions, respectively.

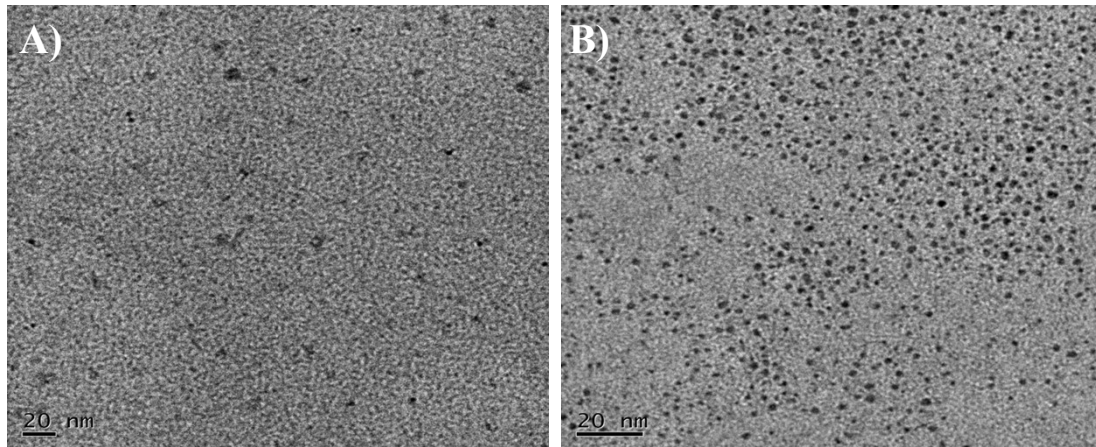

**Figure S5** TEM images of the synthesized g-C<sub>3</sub>N<sub>5</sub>-dots products at reaction time (A) 30 min, (B) 60 min.



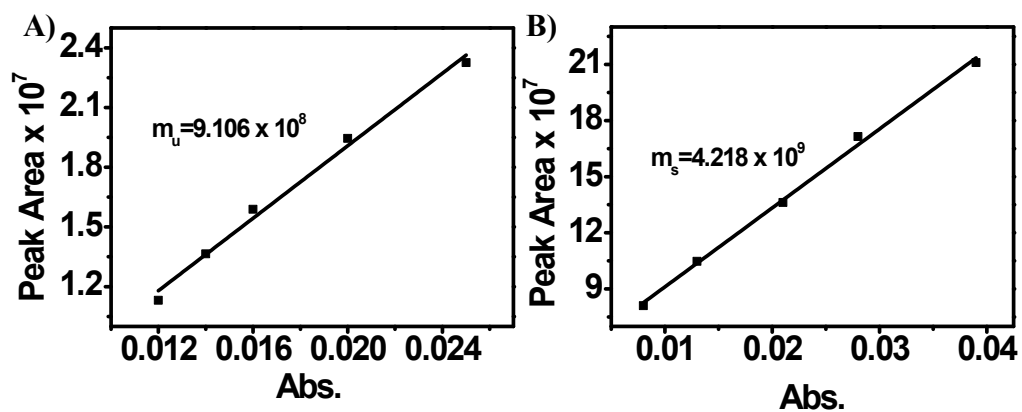

**Figure S6.** (A) The area of FL spectra of g-C<sub>3</sub>N<sub>5</sub>-dots under different absorbance. The excitation is 360 nm. Distilled water is served as solvent. (B) The area of the FL spectra of quinine sulfate under different absorbance. The excitation is 350 nm. 0.1 M H<sub>2</sub>SO<sub>4</sub> is served as solvent.

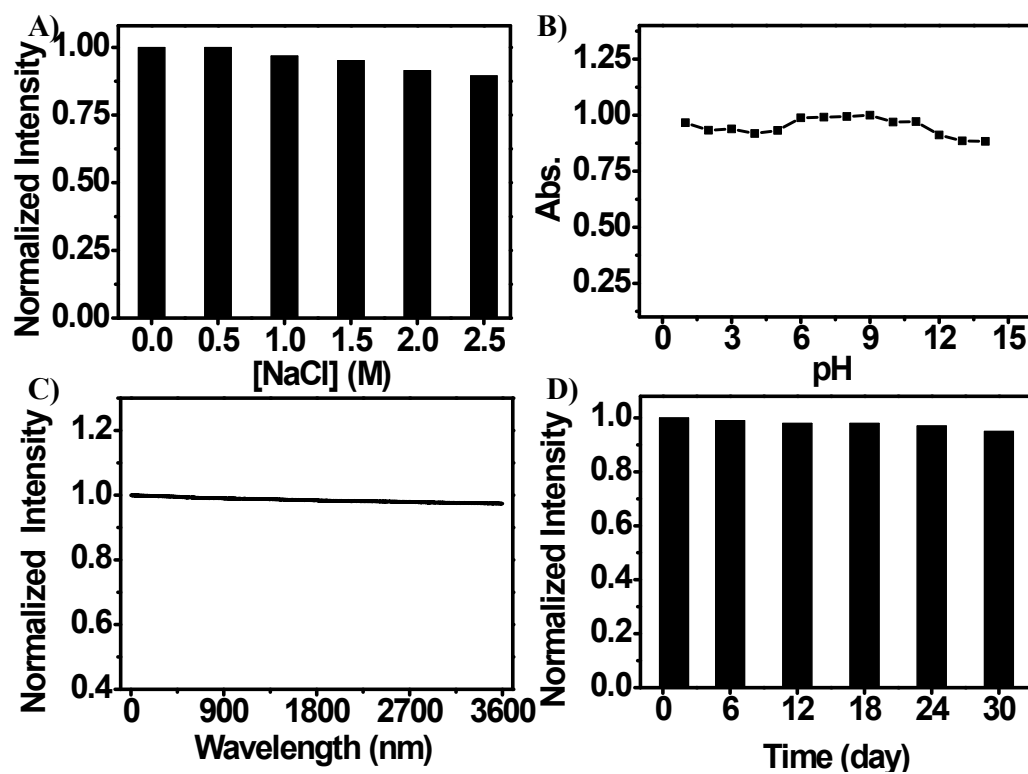

**Figure S7.** (A) The effect of NaCl and (B) the effect of pH value for the normalized FL intensity of the as-prepared g-C<sub>3</sub>N<sub>5</sub>-dots. The pH value was adjusted by 0.1 M HCl and 0.1 M NaOH. The g-C<sub>3</sub>N<sub>5</sub>-dots solution was kept at room temperature. (C) Time-course plot of FL intensity from g-C<sub>3</sub>N<sub>5</sub>-dots during continuous irradiation by a Xe lamp at 360 nm. (D) The changes of normalized FL intensity of g-C<sub>3</sub>N<sub>5</sub>-dots solution within 30 days.

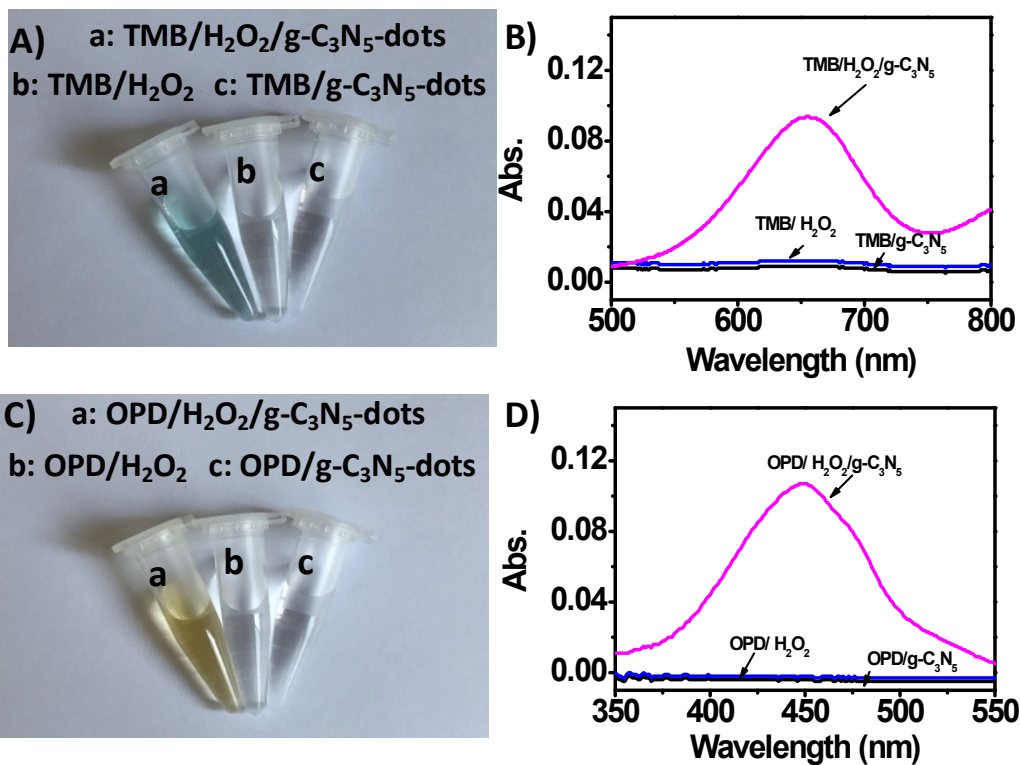

**Figure S8.** (A, C) the optical photographs and (B, D) the UV-vis spectra of (a) TMB (OPD)/H<sub>2</sub>O<sub>2</sub>/g-C<sub>3</sub>N<sub>5</sub>-dots, aqueous (b) OPD/H<sub>2</sub>O<sub>2</sub> aqueous and (c) TMB (OPD)/g-C<sub>3</sub>N<sub>5</sub>-dots aqueous, respectively. (B) Size distribution histograms of g-C<sub>3</sub>N<sub>5</sub>-dots. [g-C<sub>3</sub>N<sub>5</sub>-dots]=0.05 mg mL<sup>-1</sup>. [H<sub>2</sub>O<sub>2</sub>]=0.01 mM. [TMB]=0.5 mM and [OPD]=0.5 mM. The incubation temperature is 37 °C. The incubation time is 30 min.

## Reference

- (1) Lin, X.; Xu, D.; Zheng, J.; Song, M.; Che, G.; Wang, Y.; Yang, Y.; Liu, C.; Zhao, L.; Chang, L. Graphitic carbon nitride quantum dots loaded on leaf-like InVO<sub>4</sub>/BiVO<sub>4</sub> nanoheterostructures with enhanced visible-light photocatalytic activity. *J. Alloy. Compd.* **2016**, *688*, 891-898.
- (2) Wu, J.; Yang, S.; Li, J.; Yang, Y.; Wang, G.; Bu, X.; He, P.; Sun, J.; Yang, J.; Deng, Y.; Ding, G.; Xie, X. Electron Injection of Phosphorus Doped g-C<sub>3</sub>N<sub>4</sub> Quantum Dots: Controllable Photoluminescence Emission Wavelength in the Whole Visible Light Range with High Quantum Yield. *Adv. Opt. Mater.* **2016**, *4* (12), 2095-2101.
- (3) Lu, Q.; Wang, H.; Liu, Y.; Hou, Y.; Li, H.; Zhang, Y. Graphitic carbon nitride nanodots: As reductant for the synthesis of silver nanoparticles and its biothiols biosensing application. *Biosens. Bioelectron.* **2017**, *89*, 411-416.
- (4) Sun, B.; Lu, N.; Su, Y.; Yu, H.; Meng, X.; Gao, Z. Decoration of TiO<sub>2</sub> nanotube arrays by graphitic-C<sub>3</sub>N<sub>4</sub> quantum dots with improved photoelectrocatalytic performance. *Appl. Surf. Sci.* **2017**, *394*, 479-487.
- (5) Chen, Z.; Wu, Y.; Wang, Q.; Wang, Z.; He, L.; Lei, Y.; Wang, Z. Oxygen-rich carbon-nitrogen quantum dots as cocatalysts for enhanced photocatalytic H<sub>2</sub> production activity of TiO<sub>2</sub> nanofibers. *Prog. Nat. Sci.-Mater. Int.* **2017**, *27* (3), 333-337.
- (6) Chan, C.-F.; Zhou, Y.; Guo, H.; Zhang, J.; Jiang, L.; Chen, W.; Shiu, K.-K.; Wong, W.-K.; Wong, K.-L. pH-Dependent Cancer-Directed Photodynamic Therapy by a Water-Soluble Graphitic-Phase Carbon Nitride–Porphyrin Nanoprobe. *ChemPlusChem* **2016**, *81* (6), 535-540.
- (7) Cheng, Q.; He, Y.; Ge, Y.; Zhou, J.; Song, G. Ultrasensitive detection of heparin by exploiting the silver nanoparticle-enhanced fluorescence of graphitic carbon nitride (g-C<sub>3</sub>N<sub>4</sub>) quantum dots. *Microchim. Acta* **2018**, *185* (7), 332.
- (8) Zhang, X.; Wang, H.; Wang, H.; Zhang, Q.; Xie, J.; Tian, Y.; Wang, J.; Xie, Y. Single-Layered Graphitic-C<sub>3</sub>N<sub>4</sub> C<sub>3</sub>N<sub>5</sub> Quantum Dots for Two-Photon Fluorescence Imaging of Cellular Nucleus. *Adv. Mater.* **2014**, *26* (26), 4438-4443.
- (9) Achadu, O. J.; Nyokong, T. In situ one-pot synthesis of graphitic carbon nitride quantum dots and its 2,2,6,6-tetramethyl(piperidin-1-yl)oxyl derivatives as fluorescent nanosensors for ascorbic acid. *Anal. Chim. Acta* **2017**, *991*, 113-126.
